# Supplementary material for: Scotland's forgotten carbon: a national assessment of mid-latitude fjord sedimentary carbon stocks
Source: Copernicus journal article supplement (doi:10.5194/bg-14-5663-2017), 2017-12-15
Supplement: Supplementary file 1 [file bg-14-5663-2017-supplement.zip]

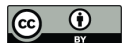

## *Supplement of*

# **Scotland's forgotten carbon: a national assessment of mid-latitude fjord sedimentary carbon stocks**

**Craig Smeaton et al.**

*Correspondence to:* Craig Smeaton (cs244@st-andrews.ac.uk)

- bg-14-5663-2017-supplement-title-page.pdf
- Sup Mat - Statistical Analysis.xlsx
- Supplementary Material.docx

The copyright of individual parts of the supplement might differ from the CC BY 4.0 License.
